**1 Watered-down biodiversity? A comparison of metabarcoding results from**  
**2 DNA extracted from matched water and bulk tissue biomonitoring samples**

3

4 Mehrdad Hajibabaei<sup>1\*</sup>, Teresita M. Porter<sup>1, 2</sup>, Chloe V. Robinson<sup>1</sup>, Donald J.  
 5 Baird<sup>3</sup>, Shadi Shokralla<sup>1</sup>, Michael Wright<sup>1</sup>

6

7 1. Centre for Biodiversity Genomics and Department of Integrative Biology,  
 8 University of Guelph, 50 Stone Road East, Guelph, ON Canada

9

10 2. Great Lakes Forestry Centre, Natural Resources Canada, 1219 Queen Street  
 11 East, Sault Ste. Marie, ON Canada

12

13 3. Environment and Climate Change Canada @ Canadian Rivers Institute,  
 14 Department of Biology, University of New Brunswick, Fredericton, NB Canada

15

16

17 \* Corresponding author: [mhajibab@uoguelph.ca](mailto:mhajibab@uoguelph.ca)

18

19

20

21

22



23

## 24 **Abstract**

25

26 Biomonitoring programs have evolved beyond the sole use of morphological  
 27 identification to determine the composition of invertebrate species assemblages in  
 28 an array of ecosystems. The application of DNA metabarcoding in freshwater  
 29 systems for assessing benthic invertebrate communities is now being employed to  
 30 generate biological information for environmental monitoring and assessment. A  
 31 possible shift from the extraction of DNA from net-collected bulk benthic samples  
 32 to its extraction directly from water samples for metabarcoding has generated  
 33 considerable interest based on the assumption that taxon detectability is  
 34 comparable when using either method. To test this, we studied paired water and  
 35 benthos samples from a taxon-rich wetland complex, to investigate differences in  
 36 the detection of taxa from each sample type. We demonstrate that metabarcoding  
 37 of DNA extracted directly from water samples is a poor surrogate for DNA extracted  
 38 from bulk benthic samples, focusing on key bioindicator groups. Our results  
 39 continue to support the use of bulk benthic samples as a basis for metabarcoding-  
 40 based biomonitoring, with nearly three times greater total richness in benthic  
 41 samples compared to water samples. We also demonstrated that few arthropod  
 42 taxa are shared between collection methods, with a notable lack of key bioindicator  
 43 EPTO taxa in the water samples. Although species coverage in water could likely  
 44 be improved through increased sample replication and/or increased sequencing



depth, benthic samples remain the most representative, cost-effective method of generating aquatic compositional information via metabarcoding.

**Key words:** Biomonitoring, metabarcoding, community DNA, eDNA, biodiversity, bioindicator, benthos.

Aquatic biomonitoring programs are designed to detect and interpret ecological change through analysis of biodiversity in target assemblages such as macroinvertebrates at a given sampling location<sup>1</sup>. The inclusion of biodiversity information in environmental impact assessment and monitoring has injected much-needed ecological relevance into a system dominated by physicochemical data<sup>2</sup>. However, current biomonitoring data suffer from coarse taxonomic resolution, incomplete observation (due to inadequate subsampling), and/or inconsistent observation (variable sampling designs and collection methods) to provide information with sufficient robustness to support the development of large-scale models for the interpretation of changing regional patterns in biodiversity<sup>3</sup>. As a result, practitioners of ecosystem biomonitoring struggle to provide information that can easily be scaled up to interpret large-scale regional change<sup>4</sup>. This is a critical deficit, as ecosystems currently face significant threats arising from large-scale, pervasive environmental drivers such as climate change, which in turn create spatially and temporally diverse and co-acting stressors<sup>5</sup>.



Over the last decade, biodiversity science has experienced a genomics/bioinformatics revolution. The technique of DNA barcoding has supported the wider use of genetic information as a global biodiversity identification and discovery tool<sup>6,7</sup>. Several studies have advocated the use of DNA barcode sequences to identify bio-indicator species (e.g., macroinvertebrates) in the context of biomonitoring applications<sup>8,9</sup>. The use of DNA sequence information for specimen identification can significantly aid biomonitoring programs by increasing taxonomic resolution (which can provide robust species-level identification) in comparison to morphological analysis (which is often limited to genus- or family-level [order, or class-level] identification). However, this methodology still requires the sorting and separation of individual specimens from environmental samples obtained through collection methods such as benthic kick-net sampling. The samples obtained routinely contain hundreds to thousands of individual organisms, many of which are immature stages which cannot be reliably identified<sup>10</sup>.

Advances in high-throughput sequencing (HTS) technologies have enabled massively parallelized sequencing platforms with the capacity to obtain sequence information from biota in environmental samples without separating individual organisms<sup>11,12</sup>. Past research has demonstrated the utility of HTS in providing biodiversity data from environmental samples that have variously been called “metagenomics”, “environmental barcoding”, “environmental DNA” or “DNA metabarcoding”<sup>12,13</sup>. These approaches are either targeted towards specific



organisms (e.g., pathogens, invasive species, or endangered species) or aim to characterize assemblages of biota. Biomonitoring applications fall mainly into the second category where assemblages are targeted for ecological analyses<sup>3</sup>. For example, macroinvertebrate larvae from benthos are considered standard bio-indicator taxa for aquatic ecosystem assessment. Previous work demonstrated the use of HTS in biodiversity analysis of benthic macroinvertebrates<sup>14,15,16</sup> and its applicability to biomonitoring programs<sup>3</sup>. Various studies have contributed to this endeavor by demonstrating capabilities and limitations of HTS in aquatic biomonitoring<sup>17,18,19,20</sup>.

An important consideration in generating DNA information via HTS analysis for biomonitoring involves the choice of samples. A wide range of sample types including water, soil, benthic sediments, gut contents, passive biodiversity samplings (e.g., malaise traps) could be used as sources for DNA extraction and analysis<sup>21</sup>. Depending on the size of the target organisms, in some cases whole organisms might be present in the samples (e.g., larval samples in benthos). However, a sample may also harbor DNA in residual tissue or cells shed from organisms that may not be present as a whole. For example, early work on environmental DNA focused on detecting relatively large target species (e.g., invasive amphibian or fish species) from DNA obtained from water samples<sup>22</sup>. The idea of analyzing DNA obtained from water has been proposed for biodiversity assessment in and around water bodies or rivers including<sup>23</sup> and specifically for



bioindicator species<sup>24</sup>. However, because benthos harbors microhabitats for bio-indicator species development and growth, it has been the main source of biodiversity samples for biomonitoring applications<sup>1</sup>. In order to evaluate the suitability of water as a source for biodiversity information of bio-indicator taxa, it is important to assess whether DNA obtained from water samples alone provides sufficient coverage of benthic bio-indicator taxa commonly used in aquatic biomonitoring.

Here, we compare benthic and water samples collected in parallel from the same wetland ponds as sources of DNA for environmental DNA (eDNA) metabarcoding analysis. Specifically, we assess whether patterns of biodiversity illuminated through DNA analysis of benthos is reflected through DNA analysis of water samples. The study system involves two adjacent deltas in northern Alberta, Canada within Wood Buffalo National Park. By comparing patterns of sequence data from operational taxonomic units (OTUs) and multiple taxonomic levels (species, genus, family, and order), we explore differences between biodiversity data (i.e. taxonomic list information) from DNA extracted from water samples as compared to DNA extracted from co-located benthic samples.

## **Methods**

### ***Field sampling***



133 Eight open-water wetland sites within the Peace-Athabasca delta complex were  
 134 sampled in August 2011. All sites were located within Wood Buffalo National Park  
 135 in Alberta, Canada. Full collection data are supplied in the Supplementary Material.  
 136 Three replicate samples of the benthic aquatic invertebrate community (hereafter  
 137 designated as 'benthos') were taken from the edge of the emergent vegetation  
 138 zone into the submerged vegetation zone at each site. Replicated, paired samples  
 139 were located approximately 100 metres apart. Samples were collected using a  
 140 standard Canadian Aquatic Biomonitoring Network (CABIN) kick net with a 400 $\mu$ m  
 141 mesh net and attached collecting cup attached to a pole and net frame. Effort was  
 142 standardized at two minutes per sample. Sampling was conducted by moving the  
 143 net up and down through the vegetation in a sinusoidal pattern while maintaining  
 144 constant forward motion. If the net became impeded by dislodged vegetation,  
 145 sampling was paused so extraneous vegetation could be removed. Sampling  
 146 typically resulted in a large amount of vegetation within the net. After sampling this  
 147 vegetation was vigorously rinsed to dislodge attached organisms, and visually  
 148 inspected to remove remaining individuals before discarding. The remaining  
 149 material was removed from the net and placed in a white 1L polyethylene sample  
 150 jar filled no more than half full. The net and collecting cup were rinsed and  
 151 inspected to remove any remaining invertebrates. Samples were preserved in 95%  
 152 ethanol in the field, and placed on ice in a cooler for transport to the field base.  
 153 Here they were transferred to a freezer at – 20 °C before shipment. A sterile net  
 154 was used to collect samples at each site and field crew wore clean nitrile gloves to



collect and handle samples in the field and laboratory, thereby minimizing the risk of DNA contamination between sites.

Three 1L water samples for subsequent DNA extraction were collected directly into sterile DNA/RNA free 1L polyethylene sample jars. Water samples were collected at the same locations as the benthos samples, immediately prior to benthic sampling to avoid disturbance, resulting in the resuspension of DNA from the benthos into the water column. Water samples were placed on ice prior to being transported to the lab.

#### ***Water sample filtering and benthos homogenization***

Under a positive pressure sterile hood, 1L water samples were filtered with 0.22  $\mu\text{m}$  filter (Mobio Laboratories). After water filtration, total DNA was extracted from the entire filter using Power water DNA extraction kit (MoBio Laboratories) and eluted in 100  $\mu\text{l}$  of molecular biology grade water, according to the manufacturer instructions. DNA samples were kept frozen at -20 C until further PCR amplification and sequencing. DNA extraction negative control was performed in parallel to ensure the sterility of the DNA extraction process.

For benthos samples, after removal of the EtOH<sup>15</sup>, a crude homogenate was produced by blending the component of each sample using a standard blender that had been previously decontaminated and sterilized using ELIMINase™ followed by a rinse with deionized water and UV treatment for 30 min. A



representative sample of this homogenate was transferred to 50 mL Falcon tubes and centrifuged at 1000 rpm for 5 minutes to pellet the tissue. After discarding the supernatant, the pellets were dried at 70°C, until the ethanol was fully evaporated. Once dry, the homogenate pellets were combined into a single tube and stored at -20°C.

Using a sterile spatula, ~300 mg dry weight of homogenate was subsampled into 3 MP matrix tubes containing ceramic and silica gel beads. The remaining dry mass was stored in the Falcon tubes at -20°C as a voucher.

DNA was extracted using a NucleoSpin tissue extraction kit (Macherey-Nagel) with a minor modification of the kit protocol: the crude homogenate was first lysed with 720  $\mu$ L T1 buffer and then further homogenized using a MP FastPrep tissue homogenizer for 40 s at 6 m/s. Following this homogenization step, the tubes were spun down in a microcentrifuge and 100  $\mu$ L of proteinase K was added to each. After vortexing, the tubes were incubated at 56°C for 24 hr. Once the incubation was completed, the tubes of digest were centrifuged for 1 min at 10,000 g and 200  $\mu$ L of supernatant was transferred to each of three sterile microfuge tubes per tube of digest. The lysate was loaded to a spin column filter and centrifuged at 11,000 g for 1 min. The columns were washed twice and dried according to the manufacturer's protocol. The dried columns were then transferred into clean 1.5 mL tubes. DNA was eluted from the filters with 30  $\mu$ L of warmed molecular biology



grade water. DNA extraction negative control was performed in parallel to ensure the sterility of the DNA extraction process.

Purity and concentration of DNA for each site was checked using a NanoDrop spectrophotometer and recorded. Samples were kept at -20°C for further PCR and sequencing.

### **Amplicon library preparation for HTS**

Two fragments within the standard COI DNA barcode region were amplified with two primer sets (A\_F/D\_R [~250 bp] called AD and B\_F/E\_R called BE [~330 bp])<sup>15,21</sup> using a two-step PCR amplification regime. The first PCR used COI specific primers and the second PCR involved Illumina-tailed primers. The PCR reactions were assembled in 25 µl volumes. Each reaction contained 2 µl DNA template, 17.5 µl molecular biology grade water, 2.5 µl 10× reaction buffer (200 mM Tris-HCl, 500 mM KCl, pH 8.4), 1 µl MgCl<sub>2</sub> (50 mM), 0.5 µl dNTPs mix (10 mM), 0.5 µl forward primer (10 mM), 0.5 µl reverse primer (10 mM), and 0.5 µl Invitrogen's Platinum Taq polymerase (5 U/µl). The PCR conditions were initiated with heated lid at 95°C for 5 min, followed by a total of 30 cycles of 94°C for 40 s, 46°C (for both primer sets) for 1 min, and 72°C for 30 s, and a final extension at 72°C for 5 min, and hold at 4°C. Amplicons from each sample were purified using Qiagen's MiniElute PCR purification columns and eluted in 30 µl molecular biology grade water. The purified amplicons from the first PCR were used as templates in



the second PCR with the same amplification condition used in the first PCR with the exception of using Illumina-tailed primers in a 30-cycle amplification regime. All PCRs were done using Eppendorf Mastercycler ep gradient S thermocyclers and negative control reactions (no DNA template) were included in all experiments.

### ***High throughput sequencing***

PCR products were visualized on a 1.5% agarose gel to check the amplification success. All generated amplicons plates were dual indexed and pooled into a single tube. The pooled library were purified by AMPure beads and quantified to be sequenced on a MiSeq flowcell using a V2 MiSeq sequencing kit (250 × 2; FC-131-1002 and MS-102-2003).

### **Bioinformatic methods**

Raw Illumina paired-end reads were processed using the SCVUC v2.3 pipeline available from [https://github.com/EcoBiomics-Zoobiome/SCVUC\\_COI\\_metabarcoding\\_pipeline](https://github.com/EcoBiomics-Zoobiome/SCVUC_COI_metabarcoding_pipeline). Briefly, raw reads were paired with SeqPrep ensuring a minimum Phred score of 20 and minimum overlap of at least 25 bp<sup>25</sup>. Primers were trimmed with CUTADAPT v1.18 ensuring a minimum trimmed fragment length of at least 150 bp, a minimum Phred score of 20 at the ends, and allowing a maximum of 3 N's<sup>26</sup>. All primer-trimmed reads were concatenated for a global ESV analysis. Reads were dereplicated with VSEARCH v2.11.0 using the 'derep\_fulllength' command and the 'sizein' and 'sizeout' options<sup>27</sup>. Denoising was performed using the unoise3 algorithm in



USEARCH v10.0.240<sup>28</sup>. This method removes sequences with potential errors, PhiX carry-over from Illumina sequencing, putative chimeric sequences, and rare reads. Here we defined rare reads to be exact sequence variants (ESVs) containing only 1 or 2 reads (singletons and doubletons)<sup>29</sup> (Callahan, McMurdie, & Holmes, 2017). An ESV x sample table was created with VSEARCH using the 'usearch\_global' command, mapping reads to ESVs with 100% identity. ESVs were taxonomically assigned using the COI Classifier v3.2<sup>30</sup>.

## Data analysis

Most diversity analyses were conducted in Rstudio with the *vegan* package<sup>31,32</sup>. Read and ESV statistics for all taxa and for arthropods only were calculated in R. To assess whether sequencing depth was sufficient we plotted rarefaction curves using a modified *vegan* 'rarecurve' function. Before normalization, we assessed the recovery of ESVs from benthos compared with water samples and assessed the proportion of all ESVs that could be taxonomically assigned with high confidence. Taxonomic assignments were deemed to have high confidence if they had the following bootstrap support cutoffs: species  $\geq 0.70$  (95% correct), genus  $\geq 0.30$  (99% correct), family  $\geq 0.20$  (99% correct) as is recommended for 200 bp fragments<sup>30</sup>. An underlying assumption for nearly all taxonomic assignment methods is that the query taxa are present in the reference database, in which case 95-99% of the taxonomic



assignments are expected to be correct using these bootstrap support cutoffs. Assignments to more inclusive ranks, ex. order, do not require a bootstrap support cutoff to ensure that 99% of assignments are correct.

To assess how diversity recovered from benthos and water samples may differ, we first normalized different library sizes by rarefying down to the 15<sup>th</sup> percentile library size using the vegan '*rrarefy*' function<sup>33</sup>. It is known that bias present at each major sample-processing step (DNA extraction, mixed template PCR, sequencing) can distort initial template to sequence ratios rendering ESV or OTU abundance data questionable<sup>17,34,35,36</sup>. Here we chose to transform our abundance matrix to a presence-absence matrix for all further analyses. We calculated ESV richness across different partitions of the data to compare differences across sites and collection methods (benthos or water samples). To check for significant differences we first checked for normality using visual methods (*ggdensity* and *ggqqplot* functions in R) and the Shapiro-Wilk test for normality<sup>37</sup>. Since our data was not normally distributed, we used a paired Wilcoxon test to test the null hypothesis that median richness across sites from benthic samples is greater than the median richness across sites from water samples<sup>38</sup>.

To assess the overall community structure detected from different collection methods, we used non-metric multi-dimensional scaling analysis on Sorensen dissimilarities (binary Bray-Curtis) using the vegan '*metaMDS*' function. A scree plot was used to guide our choice of 3 dimensions for the analysis (not



shown). A Shephard's curve and goodness of fit calculations were calculated using the vegan '*stressplot*' and '*goodness*' functions. To assess the significance of groupings, we used the vegan '*vegdist*' function to create a Sorensen dissimilarity matrix, the '*betadisper*' function to check for heterogeneous distribution of dissimilarities, and the '*adonis*' function to do a permutational analysis of variance (PERMANOVA) to check for any significant interactions between groups (collection method, sample site). We calculated the Jaccard index to look at the overall similarity between water and benthos samples.

To assess the ability of traditional bioindicator taxa to distinguish among samples, we limited our dataset to ESVs assigned to the EPTO (Ephemeroptera, Plecoptera, Trichoptera, Odonata) insect orders. No significant beta dispersion was found within groups. We used PERMANOVA to test for significant interactions between groups and sources of variation such as collection method and river delta as described above. Sample replicates were pooled. We also visualized the frequency of ESVs detected from EPTO families using a heatmap generated using *geom\_tile* (ggplot) in R.

## Results

A total of 48,799,721 x 2 Illumina paired-end reads were sequenced (Table S1). After bioinformatic processing, we retained a total of 16,841 ESVs (5,407,720 reads) that included about 11% of the original raw reads. Many reads were removed during the primer-trimming step from water samples for being too short



(< 150 bp) after primer trimming. After taxonomic assignment, a total of 4,459 arthropoda ESVs (4,399,949 reads) were retained for data analysis (Table S2). 27% of all ESVs were assigned to arthropoda, accounting for 81% of reads in all ESVs.

Rarefaction curves that reach a plateau show that our sequencing depth was sufficient to capture the ESV diversity in our PCRs (Figure S1). Benthos samples generate more ESVs than water samples as shown in the rarefaction curves as well as by the median number of reads and ESVs recovered by each collection method (Figure S2). As expected, not all arthropoda ESVs could be taxonomically assigned with confidence (Figure S3). This is probably because local arthropods may not be represented in the underlying reference sequence database. As a result, most of our analyses are presented at the finest level of resolution using exact sequence variants.

### ***Analysis of sample biodiversity***

Alpha diversity measures based on mean richness and beta diversity based on the Jaccard index among all samples show higher values for benthos compared to water at the ESV rank. The total richness for benthos is 1,588 and water is 658, with a benthos:water ratio of 2.4. The Jaccard index is 0.14 indicating that water and benthos samples are 14% similar. Examining the arthropod ESV richness for each sample site from benthos and water collections reinforces the general pattern



of higher detected richness from benthos samples (Wilcoxon test,  $p$ -value  $< 0.05$ ) (Figure 1).

**Figure 1. Median arthropod richness per site is higher in benthos samples than water samples.** Results are based on normalized data.

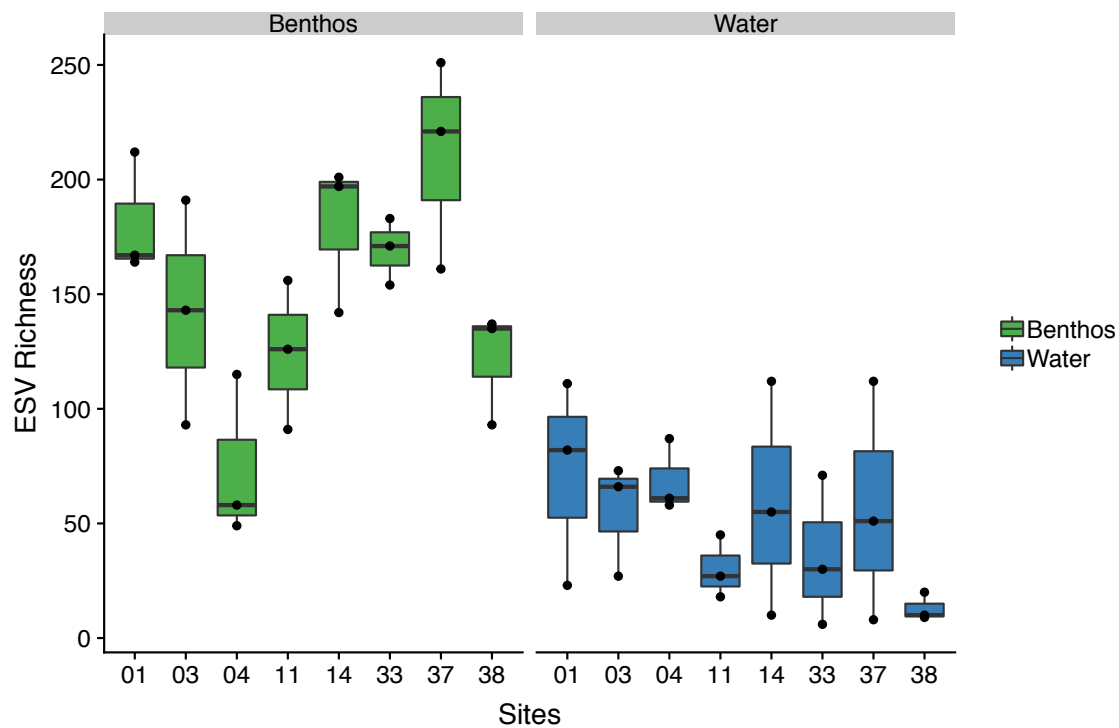

We further illustrate how arthropod richness varies with collection method (benthos or water) by looking at the number of ESVs exclusively found from benthos samples, found both benthos and water samples, or exclusively found



from water samples (Figure 2). For example, for sample 04B, 49% of ESVs are unique to benthos samples, 37% of ESVs are unique to water samples, and 14% of ESVs are shared. In fact, this sample contains the largest proportion of shared ESVs. When looking at more inclusive taxonomic ranks, more of the community is shared among benthos and water samples. When considering specific arthropod orders and genera, a greater diversity of sequence variants are detected from benthic samples even when the same higher-level taxa are also recovered from water samples (Figure 3). Some of the confidently identified arthropod genera represented by more than 100 sequence variants included: *Tanytarsus* (Diptera identified from benthos-B and water-W), *Aeshna* (Odonata, B only), *Leucorrhinia* (Odonata, B only), and *Scapholeberis* (Diplostraca, B + W).

**Figure 2. Few arthropod ESVs are shared among benthic and water samples.**

The ternary plot shows the proportion of ESVs unique to benthos samples, unique to water samples, or shared. Sample names are shown directly on the plot. Results are based on normalized data.



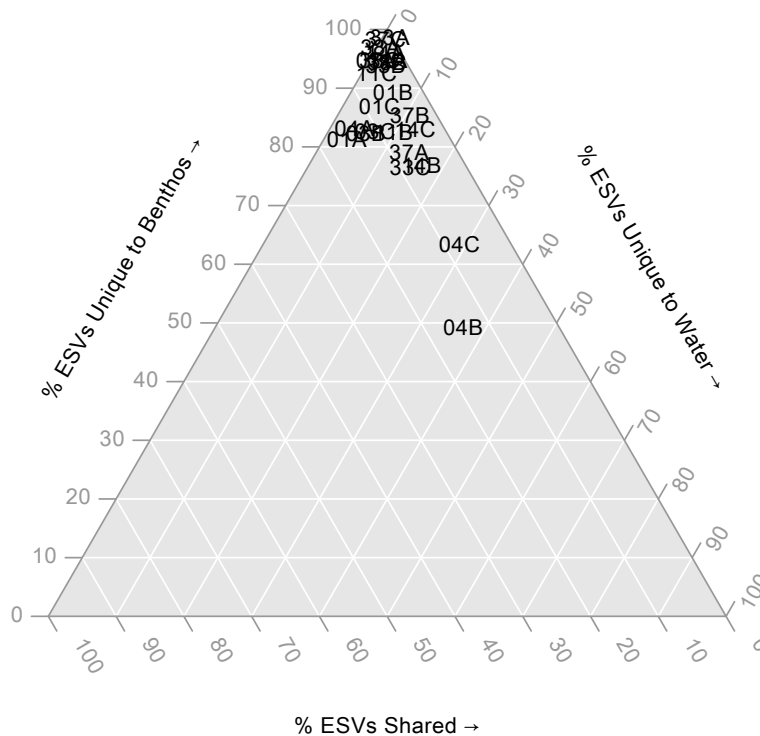

**Figure 3. A greater diversity of arthropod sequence variants are detected from benthic samples.** Each point represents a genus identified with high confidence and the number of benthic and water exact sequence variants (ESVs) with this taxonomic assignment. Only genera represented by at least 2 ESVs in both benthic and water samples are labelled in the plot for clarity. The points are color coded for the 17 arthropod orders detected in this study. A 1:1 correspondence line (dotted) is also shown. Points that fall above this line are represented by a greater number of ESVs from benthic samples. A log<sub>10</sub> scale is shown on each axis to improve the spread of points with small values.







(p-value = 0.001), and collection method explained ~ 9% of the variance in beta diversity (p-value = 0.001). Thus, even though richness measures are highly sensitive to choice of collection method, beta diversity is robust with samples clearly clustering by river delta regardless of whether benthos or water samples are analyzed (p-value = 0.001; Figure S4).

**Figure 4. Samples cluster by collection method and river delta.** The NMDS is based on rarefied data and Sorensen dissimilarities based on presence-absence data. The first plot shows sites clustered by collection method, benthos or water. The second plot shows sites clustered by river delta, Athabasca River or Peace River delta.



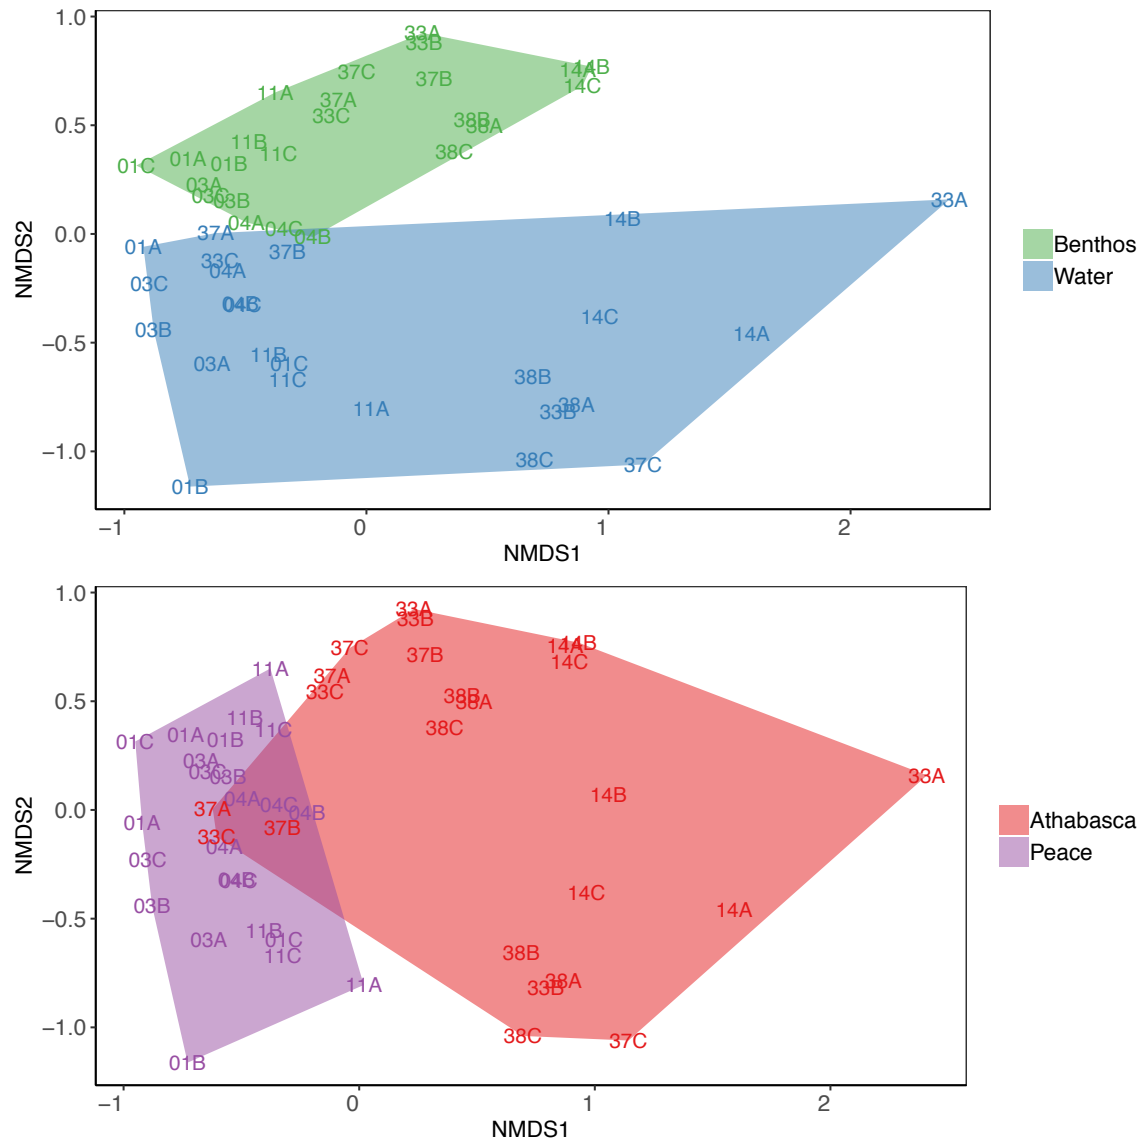

## Analysis of key bioindicator groups

Given the importance of aquatic insects as bioindicator species in standard biomonitoring programs, and to specifically address whether water samples could be used in lieu of benthos for biomonitoring applications, we closely examined the results obtained for four insect orders of biomonitoring importance. Based on the detection of EPTO ESVs, collection method (benthos or water) accounts for 13%



of the variation in ordination distances (PERMANOVA, p-value=0.011; Table S3). Overall, these differences stem from variation in the distribution of ESVs detected from 76 observed EPTO families (Figure 5). While the total number of ESVs and EPTO families varied from site to site, there is a dramatic shift in the composition detected from benthos and water. For example, in site 1, 888 ESVs from 40 EPTO families were detected from the benthos sample, while only 133 ESVs from 9 EPTO families were observed from the water sample, despite being taken at the exact same location and time. Within each collection method, river delta explains 11% of the variation (PERMANOVA, p-value=0.031). This means is that despite differences in the community composition detected from benthos and water, EPTO ESVs can still be used to separate samples from two river deltas.

**Figure 5. More Ephemeroptera, Plecoptera, Trichoptera, and Odonata family ESVs are detected from benthos compared with water samples.**

Each cell shows ESV richness colored according to the legend. Grey cells indicate zero ESVs. Only ESVs taxonomically assigned to families with high confidence (bootstrap support  $\geq 0.20$ ) are included. Based on normalized data.



430

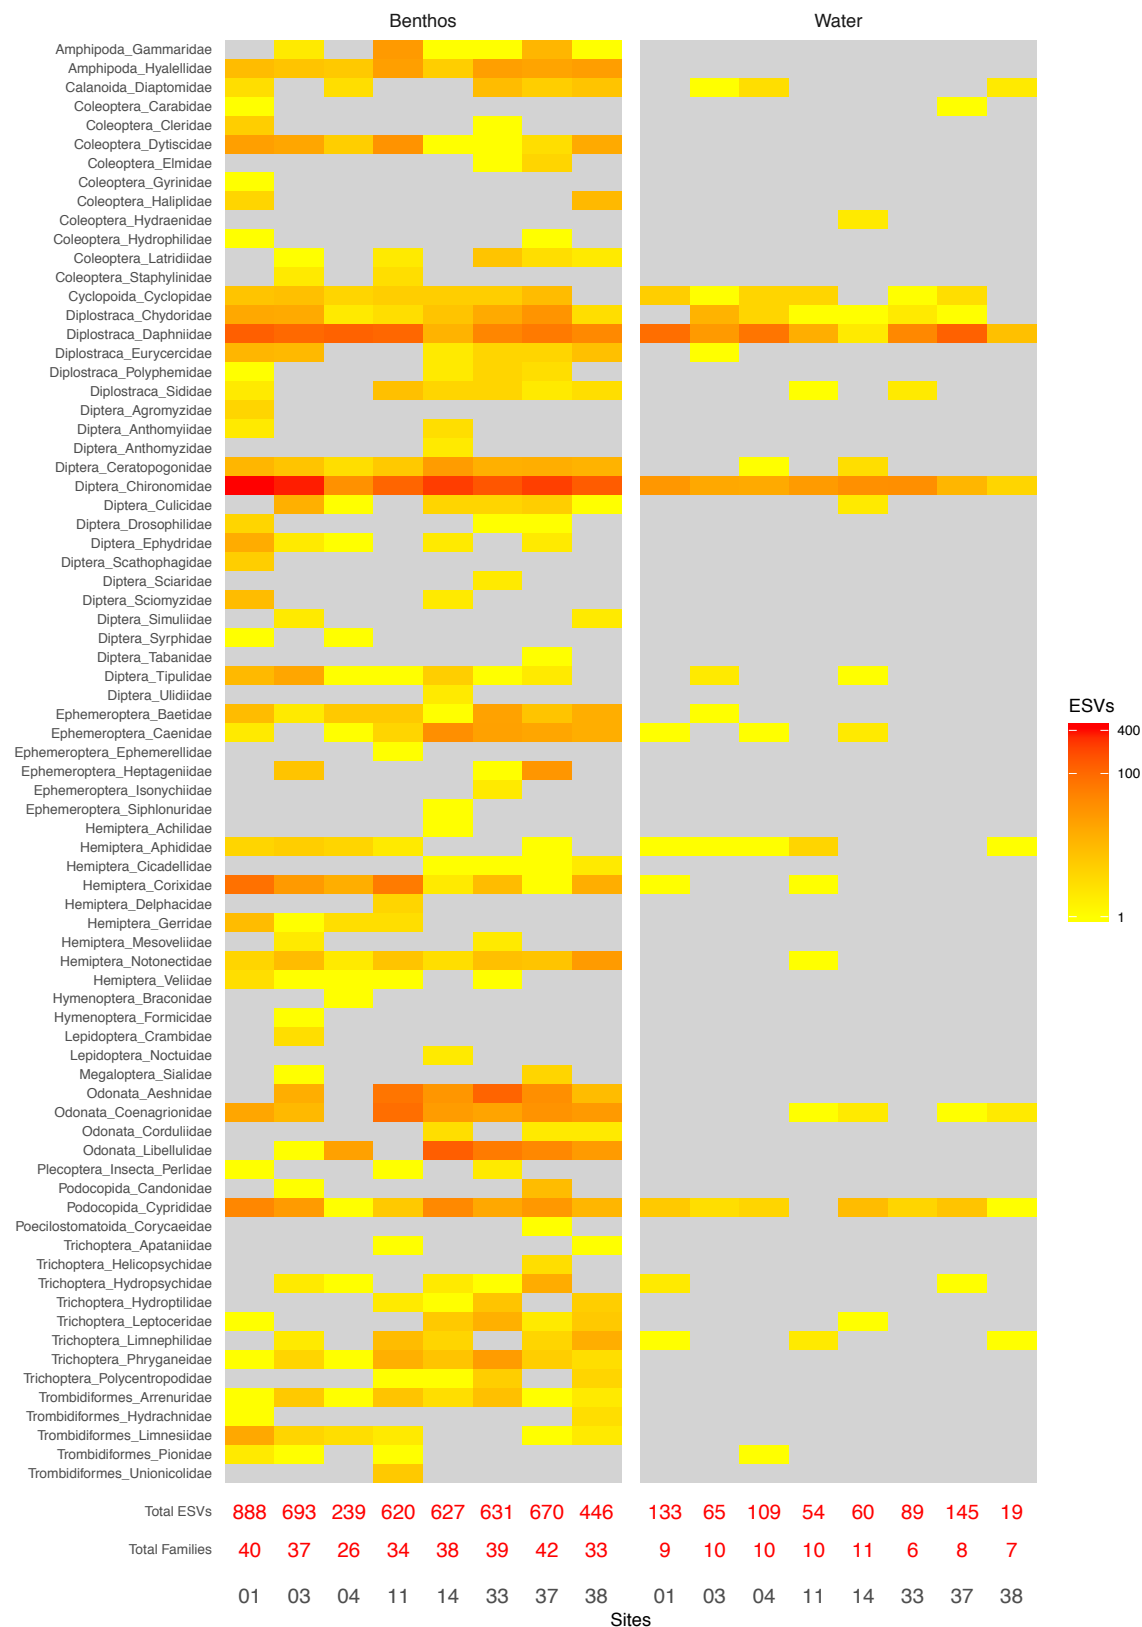

431



432

## 433 **Discussion**

434       Biodiversity information forms the basis of a vast array of ecological and  
 435 evolutionary investigations. Given that biodiversity information for bioindicator  
 436 groups, such as aquatic insects, is the main source of biological data for various  
 437 environmental impact assessment and monitoring programs, it is vital for these  
 438 data to provide a consistent and accurate representation of existing taxon  
 439 richness<sup>40</sup>. Methods based on bulk sampling of environmental material (i.e. water)  
 440 for identification of either single species<sup>41</sup> or communities<sup>42</sup>, has been proposed as  
 441 a simplified biomonitoring tool<sup>23,24,43</sup>. However, our analysis shows that water  
 442 eDNA fails to provide a rich representation of the community structure in aquatic  
 443 ecosystems. Our unique sampling design allowed us to undertake a direct  
 444 comparison as we were able to collect samples from benthos and water in parallel  
 445 across a range of sites. These wetland sites consisted of small ponds with minimal  
 446 or no flow, minimizing the chance of stream flow as a factor impacting the  
 447 availability of eDNA in a given water sample.

448

449       Our analysis of taxon richness in benthos versus water illuminates the need  
 450 for caution when interpreting data captured from water as an estimate of total  
 451 richness in a system. In some cases, we saw several-fold decreases in richness  
 452 in water versus benthos. Although a comprehensive analysis of taxon richness  
 453 should not rely solely on numbers, this reduction in taxa detected indicates the



inadequacy of water for solely detecting existing aquatic invertebrate communities. In comparison, a recent study suggested that eDNA metabarcoding in flowing systems recovers higher levels of richness than bulk benthos samples<sup>44</sup>. However, our study design allowed a direct comparison between water and benthos for both EPTO and general richness without the influence of flow, meaning this was a true assessment of local community assemblages, represented by each sample type. eDNA metabarcoding in flowing systems can therefore result in the additional detection of upstream communities<sup>44</sup>, reflected in the greater number of taxa detected, but does not reflect the existing biodiversity at the local scale.

An important consideration when deciding effective biomonitoring methods should be the ecology of target biodiversity units. Factors including life cycle and habitat preference (i.e. benthic or water column) is likely to influence the rate of detection in different sampling approaches<sup>45,46,47</sup>. We have demonstrated in this study that whilst some ESVs are shared between both benthos and water, there is a sampling bias as to the associations of taxa, particularly EPTO, with different sample sources, which was also observed in a recent comparative study with running water<sup>44</sup>. The association of specific taxa with benthos enables communities to be assessed spatially, across different habitat types<sup>14,48</sup>. One of the major limitations of attempting to determine presence/absence of taxa in water is the uncertainty of the original DNA source. As samples are often collected at single fixed locations, taxa recovered in water can vary depending on when and



where DNA was released into the aqueous environment in addition to other factors including flow rate<sup>23</sup>. This makes scaling up results from water challenging<sup>49</sup>. Conversely, benthos samples enable a real-time assessment of biodiversity originating from a known locality, which has implications for fine-scale environmental assessments<sup>14</sup>.

Environmental factors including hydrolysis drive DNA degradation in aqueous substrates, which can negatively influence detectability of DNA in water<sup>50</sup>. This confounding factor could account for some of the reduction in biodiversity observed between benthos and water<sup>51</sup>. For water sampling to improve species coverage and gain a comparable number of observations, a considerable increase in replicates and sequencing depth is required<sup>52,53</sup>. Earlier research has shown that increasing the volume of water up to 2 L does not seem to be a factor in additional taxonomic coverage<sup>24</sup>, however increasing the number of both biological and technical replicates can increase the number of taxa detected<sup>52,53,55</sup>. We used triplicate sampling for each site and compared EPTO taxa between sites and two rivers, separately. None of these comparisons provided support for the use of water eDNA in place of benthos. We found that benthos replicates clustered closer with less variation in ESV abundance in comparison with water, which suggests that three replicates is sufficient for consistent species detection with benthos and water is less consistent at representing community structure. In addition, using highly degenerate primers can increase the total biodiversity detected using eDNA



metabarcoding<sup>44</sup>. However, with highly degenerated primers, there is an increase  
likelihood of amplifying non-target regions<sup>56</sup>, in comparison to primers with lower  
degeneracy such as those used in this study. Additionally, employing highly  
degenerate primers in biomonitoring studies lead to overrepresentation of some  
taxa (e.g. non-metazoan), which further distances such metabarcoding studies  
from current stream ecosystem assessment methods<sup>44,57</sup>. Attempting to improve  
taxonomic coverage of water by increasing numbers of samples collected,  
sequencing depth and utilising highly degenerate primers, adds considerable  
costs, both financial, in terms of effort and comparability, without the guarantee of  
representative levels of biodiversity identification.

## Conclusions

It is apparent that in data generated from our comparative study, employing  
water column samples as a surrogate for true benthic samples is not supported,  
as benthos DNA does not appear to be well represented in the overlying water in  
these static-water wetland systems at detectable levels. Benthic samples are a  
superior source of biomonitoring DNA when compared to water in terms of  
providing reproducible taxon richness information at a variety of spatial scales.  
Choice of sampling method is a critical factor in determining the taxa detected for  
biomonitoring assessment and we believe that a comprehensive assessment of  
total biodiversity should include multiple sampling methods to ensure that  
representative DNA from all target organisms can be captured.



## References

1. Bonada, N., Prat, N., Resh, V. H. & Statzner, B. Developments in Aquatic Insect Biomonitoring: A Comparative Analysis of Recent Approaches. *Ann Re. Entomol* **51**, 495–523 (2006).
2. Friberg, N. *et al.* Biomonitoring of human impacts in freshwater ecosystems: the good, the bad, and the ugly. *Adv Ecol Res* **44**, 1-69 (2011).
3. Baird, D. J. & Hajibabaei, M. Biomonitoring 2.0: A New Paradigm in Ecosystem Assessment Made Possible by next-Generation DNA Sequencing. *Mol Ecol* **21**, 2039–44 (2012).
4. Hajibabaei M., Baird, D. J., Fahner, N. A., Beiko, R. G. & G.B. Golding. A new way to contemplate Darwin's tangled bank: how DNA barcodes are reconnecting biodiversity science and biomonitoring. *Philos T Roy Soc B* **371**, 20150330 (2016).
5. Dafforn, K. A. *et al.* Big data opportunities and challenges for assessing multiple stressors across scales in aquatic ecosystems. *Mar Freshwater Res* **67**, 393–413 (2016).
6. Hajibabaei, M., Singer, G. A. C., Hebert, P. D., & Hickey, D.A. DNA Barcoding: how It complements taxonomy, molecular phylogenetics and population genetics. *Trends Genet* **23**, 167–72 (2007).



- 541 7. Hebert, P. D. N., Hollingsworth, P. & Hajibabaei, M. From writing to reading the  
542 encyclopedia of life. *Philos Trans R Soc Lond B Biol Sci* **5**, 20150321  
543 (2016).
- 544 8. Sweeney, B. W., Battle, J. M., Jackson, J. K. & Dapkey, T. Can DNA barcodes  
545 of stream macroinvertebrates improve descriptions of community structure  
546 and water quality?" *J N AM Benthol Soc* **30**, 195–216 (2011).
- 547 9. Pilgrim, E. M. *et al.* Incorporation of DNA barcoding into a large-scale  
548 biomonitoring program: opportunities and pitfalls. *J N AM Benthol Soc* **30**,  
549 217–31 (2011).
- 550 10. Orlofske, J. M. & Baird, D. J. The tiny mayfly in the room: Implications of size-  
551 dependent invertebrate identification for biomonitoring data properties.  
552 *Aquat Ecol* **47**, 481–494 (2014).
- 553 11. Shokralla, S., Spall, J. L., Gibson, J. F. & Hajibabaei, M. Next-Generation  
554 sequencing technologies for environmental DNA research. *Mol Ecol* **21**,  
555 1794–1805 (2012).
- 556 12. Hajibabaei, M. The golden age of DNA metasystematics. *Trends Genet* **28**,  
557 535–37 (2012).
- 558 13. Taberlet, P., Coissac, E., Hajibabaei, M. & Rieseberg, L. H. Environmental  
559 DNA. *Mol Ecol* **21**, 1789–93 (2012).
- 560 14. Hajibabaei, M., Shokralla, S., Zhou, X., Singer, G. A. C. & Baird, D. J. 2011.  
561 Environmental barcoding: a next-generation sequencing approach for



562           biomonitoring applications using river benthos. *PLoS ONE* **6**, e17497  
563           (2011).

564   15. Hajibabaei, M., Spall, J. L., Shokralla, S. & van Konynenburg, S. V. Assessing  
565           biodiversity of a freshwater benthic macroinvertebrate community through  
566           non-destructive environmental barcoding of DNA from preservative ethanol.  
567           *BMC Ecol* **12**, 28 (2012).

568   16. Gibson, J. F. *et al.* 2015. Large-scale biomonitoring of remote and threatened  
569           ecosystems via high-throughput sequencing. *PLoS ONE* **10**, e0138432  
570           (2015).

571   17. Elbrecht, V., & Leese, F. Can DNA-based ecosystem assessments Quantify  
572           Species abundance? Testing primer bias and biomass-sequence  
573           relationships with an innovative metabarcoding protocol.” *PLoS ONE* **10**,  
574           e0130324 (2015).

575   18. Carew, M. E, Pettigrove, V. J., Metzeling, L. & Hoffmann, A. A. Environmental  
576           monitoring using next generation sequencing: rapid identification of  
577           macroinvertebrate bioindicator species. *Front Zool* **10**, 45 (2013).

578   19. Lejzerowicz, F. *et al.* High-throughput sequencing and morphology perform  
579           equally well for benthic monitoring of marine ecosystems. *Sci Rep* **5**, 13932  
580           (2015).

581   20. Dowle, E. J, Pochon, X., Banks, J., Shearer, K. & Wood, S. A. Targeted gene  
582           enrichment and high throughput sequencing for environmental



583           biomonitoring: a case study using freshwater macroinvertebrates. *Mol Ecol*  
584           *Resour* **16**, 1240-1254 (2016).

585   21. Gibson, J. F. *et al.* 2014. Simultaneous assessment of the macrobiome and  
586           microbiome in a bulk sample of tropical arthropods through DNA  
587           metasystematics. *P Natl Acad Sci USA* **111**, 8007–8012 (2014).

588   22. Ficetola, G. F, Miaud, C., Pompanon, F. & Taberlet, P. Species detection using  
589           environmental DNA from water samples. *Biology Lett* **4**, 423–25 (2008).

590   23. Deiner, K., Fronhofer, E. A., Meachler, E., Walser, J-C. & Altermatt, F.  
591           Environmental DNA reveals that rivers are conveyer belts of biodiversity  
592           information. *Nat Comm* **7**, 12544 (2016).

593   24. Machler, E., Deiner, K., Spahn, F. & Altermatt, F. Fishing in the water: effect of  
594           sampled water volume on environmental DNA-based detection of  
595           macroinvertebrates.” *Envir Sci Tech* **50**, 305–12 (2016).

596   25. St. John, J. SeqPrep. Retrieved from  
597           <https://github.com/jstjohn/SeqPrep/releases>. (2016).

598   26. Martin, M. Cutadapt removes adapter sequences from high-throughput  
599           sequencing reads. *EMBnet* **17**, 1-10 (2011).

600   27. Rognes, T., Flouri, T., Nichols, B., Quince, C., & Mahé, F. VSEARCH: a  
601           versatile open source tool for metagenomics. *PeerJ* **4**, e2584 (2016).

602   28. Edgar, R. C. UNOISE2: improved error-correction for Illumina 16S and ITS  
603           amplicon sequencing. *BioRxiv* doi:10.1101/081257 (2016).



- 604 29. Callahan, B. J., McMurdie, P. J., & Holmes, S. P. Exact sequence variants  
605 should replace operational taxonomic units in marker-gene data analysis.  
606 *ISME* **11**, 2639–2643 (2017).
- 607 30. Porter, T. M., & Hajibabaei, M. Automated high throughput animal CO1  
608 metabarcode classification. *Sci Rep* **8**, 4226 (2018).
- 609 31. RStudio Team. RStudio: Integrated Development Environment for R.  
610 Retrieved from <http://www.rstudio.com/> (2016).
- 611 32. Dixon, P., & Palmer, M. W. VEGAN, a package of R functions for community  
612 ecology. *J Veg Sci* **14**, 927–930 (2003).
- 613 33. Weiss, S. et al. Normalization and microbial differential abundance strategies  
614 depend upon data characteristics. *Microbiome* **5**, 27 (2017).
- 615 34. Suzuki, M. T., & Giovannoni, S. J. Bias caused by template annealing in the  
616 amplification of mixtures of 16S rRNA genes by PCR. *Appl Environ Microb*  
617 **62**, 625–630 (1996).
- 618 35. Polz, M. F., & Cavanaugh, C. M. Bias in template-to-product ratios in  
619 multitemplate PCR. *Appl Environ Microb* **64**, 3724–3730 (1998).
- 620 36. McLaren, M. R., Willis, A. D., & Callahan, B. J. Consistent and correctable  
621 bias in metagenomic sequencing measurements. *BioRxiv*  
622 doi:10.1101/559831(2019).
- 623 37. Shapiro, S. S., & Wilk, M. B. An Analysis of Variance Test for Normality  
624 (Complete Samples). *Biometrika* **52**, 591–611 (1965).



- 625 38. Wilcoxon, F. Individual Comparisons by Ranking Methods. *Biometrics Bull* **1**,  
626 80–83 (1945).
- 627 39. Anderson, M. J., & Walsh, D. C. I. PERMANOVA, ANOSIM, and the Mantel  
628 test in the face of heterogeneous dispersions: What null hypothesis are  
629 you testing? *Ecol Monogr* **83**, 557–574 (2013).
- 630 40. Dickie, I. A. *et al.* Towards robust and repeatable sampling methods in eDNA-  
631 based studies. *Mol Ecol Resour* **18**, 940-952 (2018).
- 632 41. Rees, H. C. *et al.* 2014. REVIEW: The detection of aquatic animal species  
633 using environmental DNA – a review of eDNA as a survey tool in ecology.  
634 *J Appl Ecol* **51**, 1450-1459 (2014).
- 635 42. Valentini, A. *et al.* Next-generation monitoring of aquatic biodiversity using  
636 environmental DNA metabarcoding. *Mol Ecol* **25**, 929–42 (2015).
- 637 43. Machler, E., Deiner, K., Steinmann, P. & Altermatt, F. 2014. Utility of  
638 environmental DNA for monitoring rare and indicator macroinvertebrate  
639 species. *Freshw Sci* **33**, 1174–83 (2014).
- 640 44. Macher, J-N. *et al.* Comparison of environmental DNA and bulk-sample  
641 metabarcoding using highly degenerate cytochrome c oxidase I primers.  
642 *Mol Ecol Resour* **18**, 1456-1468 (2018).
- 643 45. Culp, J. M. *et al.* 2012. Incorporating traits in aquatic biomonitoring to enhance  
644 causal diagnosis and prediction. *Integr Environ Assess* **7**, 187-197 (2012).



- 645 46. Tréguier, A. *et al.* 2014. Environmental DNA surveillance for invertebrate  
646 species: advantages and technical limitations to detect invasive crayfish  
647 *Procambarus clarkii* in freshwater ponds. *J Appl Ecol* **51**, 871-879 (2014).
- 648 47. Koziol, A. *et al.* 2018. Environmental DNA metabarcoding studies are critically  
649 affected by substrate selection. *Mol Ecol Resour in press* (2018).
- 650 48. Yoccoz, N. G. The future of environmental DNA in ecology. *Mol Ecol* **21**, 2031-  
651 2038 (2012).
- 652 49. Roussel, J-M., Paillisson, J-M., Tréguier, A. & Petit, E. The downside of eDNA  
653 as a survey tool in water bodies. *J Appl Ecol* **52**, 823-826 (2015).
- 654 50. Bohmann, K. *et al.* Environmental DNA for wildlife biology and biodiversity  
655 monitoring. *Trends Ecol Evol* **29**, 358-367 (2014).
- 656 51. Schultz, M.T. & Lance, R. F. Modelling the sensitivity of field surveys for  
657 detection of environmental DNA (eDNA). *PLoS ONE* **10**, e0141503 (2015).
- 658 52. Ficetola, G. F. *et al.* Replication levels, false presences and the estimation of  
659 the presence/absence from eDNA metabarcoding data. *Mol Ecol Resour*  
660 **15**, 543-556 (2015).
- 661 53. Alberdi, A., Aizpurua, O., Gilbert, M. T. P. & Bohmann, K. 2018. Scrutinizing  
662 key steps for reliable metabarcoding of environmental samples. *Methods*  
663 *Ecol Evol* **9**, 134-147 (2018).
- 664 54. Furlan, E. M., Gleeson, D., Hardy, C. M. & Duncan, R. P. A framework for  
665 estimating the sensitivity of eDNA surveys. *Mol Ecol Resour* **16**, 641–654  
666 (2016).



- 667 55. Lanzén, A., Lekang, K., Jonassen, I., Thompson, E. M. & Troedsson, C. DNA  
668 extraction replicates improve diversity and compositional dissimilarity in  
669 metabarcoding of eukaryotes in marine sediments. *PLoS ONE* **12**,  
670 e0179443 (2017).
- 671 56. Elbrecht, V., & Leese, F. 2017. Validation and development of COI  
672 metabarcoding primers for freshwater macroinvertebrate bioassessment.  
673 *Frontiers Environ Sci* **5**, 1-11 (2017).
- 674 57. Weigand, A. M. & Macher, J-N. A DNA metabarcoding protocol for hyporheic  
675 freshwater meiofauna: Evaluating highly degenerate COI primers and  
676 replication strategy. *Metabarcoding and Metagenomics* **2**, e26869 (2018).

677

## 678 **Acknowledgements**

679 T.M. Porter was supported by the Government of Canada through the Genomics  
680 Research and Development Initiative (GRDI), Ecobiomics project. We  
681 acknowledge field support from Parks Canada (Jeff Shatford, Ronnie & David  
682 Campbell) and Environment and Climate Change Canada (Daryl Halliwell) for the  
683 process of sample collection. This study is funded by the government of Canada  
684 through Genome Canada and Ontario Genomics.

685

## 686 **Author contributions and competing interests**

687 M.H. designed the overall study, contributed to genomics and bioinformatics  
688 analyses, and wrote the manuscript; T.M.P. conducted bioinformatic processing,



helped analyze data, and helped to write the manuscript; S.S. conducted molecular biology and genomics analyses; C.V.R. assisted with interpreting data and helped to write the manuscript. D.J.B. planned and organised the field study, collected the samples and helped to write the manuscript; M.W. conducted molecular biology and genomics analyses. The authors declare no competing interests.

#### **Data availability**

Raw sequences will be deposited to the NCBI SRA on acceptance. A FASTA file of ESV sequences are available in the Supplementary Material. The bioinformatic pipeline and scripts used to create figures are available on GitHub at <https://github.com/terrimporter/CO1Classifier>.
